---

## Correction

*cAMP signalling meets mitochondrial compartments*

By Konstantinos Lefkimiatis

Volume 42, Part 2 (2014), pp. 265–269

Owing to an error introduced during the production process, on p. 267, the unit for the molecular mass of cAMP was given incorrectly as kDa. It should be Da, i.e. ~329 Da.
